# Supplementary material for: Assessment of Metal and Heavy Metal Concentrations in the Angola Catchment, Freetown, Sierra Leone
Source: Research Square preprint supplement (doi:10.21203/rs.3.rs-6135361/v1), 2025-03-28
Supplement: Supplementary file 1 [file cc616ff1fd41767591b9d784.xlsx]

## Sheet: upp
	Parameter	UPPER STREAM
Date	Water Temperature (°C)	Mean	pH	Mean	Chromium (Mg/L)	Mean	Copper (Mg/L)	Mean	Iron (Mg/L)	Mean	Manganese (Mg/L)	Mean	Arsenic (Mg/L)	Mean
15/3/24	28.1	28.65	6.8	6.94	0.07	0.1887	0.06	0.734	0.2	0.25	0.45	0.446	0	0
15/4/24	28.6		6.7		0.18		0.07		0.2		0.5		0
15/5/24	28.7		6.9		0.09		0.08		0.25		0.3		0
15/6/24	28.9		7.1		0.09		0.08		0.27		0.47		0
15/7/24	28.9		7.2		0.28		0.07		0.3		0.44		0
16/8/24	28.6		7.1		0.26		0.06		0.3		0.46		0
15/9/24	28.9		6.9		0.267		0.08		0.24		0.5		0
14/10/24	28.7		6.7		0.26		0.07		0.2		0.48		0
15/11/24	28.5		7.1		0.19		0.08		0.28		0.39		0
15/12/24	28.6		6.9		0.2		0.084		0.26		0.47		0
	283.9		69.4		1.887		0.734		2.5		4.46		0

## Sheet: Mid 
	Parameter	MID STREAM
Date	Water Temperature (°C)	Mean	pH	Mean	Chromium (Mg/L)	Mean	Copper (Mg/L)	Mean	Iron (Mg/L)	Mean	Manganese (Mg/L)	Mean	Arsenic (Mg/L)	Mean
15/3/24	28	28.52	6.9	6.98	0.061	0.0841	0.084	0.0746	0.26	0.263	0.38	0.475	0	0
15/4/24	28.6		7.2		0.05		0.07		0.21		0.33		0
15/5/24	28.5		7.1		0.08		0.088		0.27		0.53		0
15/6/24	28.7		7.2		0.17		0.07		0.25		0.49		0
15/7/24	28.5		6.8		0.15		0.065		0.26		0.52		0
16/8/24	28.6		6.9		0.06		0.071		0.34		0.48		0
15/9/24	28.5		6.8		0.06		0.08		0.24		0.49		0
14/10/24	28.5		7.1		0.05		0.069		0.3		0.51		0
15/11/24	28.7		6.9		0.07		0.08		0.25		0.52		0
15/12/24	28.6		6.9		0.09		0.069		0.25		0.5		0
	285.3		69.8		0.841		0.746		2.63		4.75		0

## Sheet: down
	Parameter	DOWN STREAM
Date	Water Temperature (°C)	Mean	pH	Mean	Chromium (Mg/L)	Mean	Copper (Mg/L)	Mean	Iron (Mg/L)	Mean	Manganese (Mg/L)	Mean	Arsenic (Mg/L)	Mean
15/3/24	28.6	28.39	6.9	6.96	0.07	0.194	0.068	0.0675	0.22	0.286	0.3	0.466	0	0
15/4/24	28.6		6.8		0.26		0.068		0.29		0.47		0
15/5/24	27.8		7.1		0.23		0.069		0.38		0.52		0
15/6/24	28.4		6.9		0.22		0.058		0.34		0.45		0
15/7/24	28.5		7.2		0.24		0.068		0.31		0.49		0
16/8/24	28.6		6.8		0.07		0.068		0.29		0.48		0
15/9/24	28.5		6.9		0.24		0.069		0.07		0.51		0
14/10/24	28.4		7.1		0.2		0.069		0.32		0.5		0
15/11/24	28.3		7.1		0.21		0.069		0.3		0.48		0
15/12/24	28.2		6.8		0.2		0.069		0.34		0.46		0
	283.9		69.6		1.94		0.675		2.86		4.66		0

## Sheet: Mean
		Upper Stream			Middle Stream			Down Stream
No	Parameters	Min	Max	Mean	Min	Max	Mean	Min	Max	Mean
1	Temperature	28.1	28.9	28.65	28	28.7	28.52	27.8	28.6	28.39
2	pH	6.7	7.2	6.94	6.8	7.2	6.98	6.8	7.2	6.96
3	Chromium	0.07	0.28	0.1887	0.05	0.17	0.0841	0.07	0.26	0.194
4	Copper	0.06	0.084	0.0734	0.065	0.088	0.0734	0.058	0.069	0.0675
5	Iron	0.2	0.3	0.25	0.21	0.34	0.263	0.07	0.38	0.286
6	Manganese	0.3	0.5	0.446	0.33	0.53	0.475	0.3	0.52	0.466
7	Arsenic	0	0	0	0	0	0	0	0	0
8	Zinc	0.3	0.5	0	0.33	0.4	0	0.31	0.4	0
9	Lead	0	0	0.446	0	0	0.36	0	0	0.446

## Sheet: wqi up
							UPPER STREAM
Parameter	WHO (SV)	1/Si	1/Si	K	W	Ideal Value (Vo)	V (point)	Vn/S	Qn	WnQn
pH	8.5	0.117647	226.784	0.00440948	0.000518762	7	-0.04	-0.00470588	-0.470588	-0.000244123
Chromium	0.05	20	226.784	0.00440948	0.0881895	0	0.1887	3.774	377.4	33.2827
Copper	2	0.5	226.784	0.00440948	0.00220474	0	0.0734	0.0367	3.67	0.00809139
Iron	0.3	3.33333	226.784	0.00440948	0.0146983	0	0.25	0.833333	83.3333	1.22485
Manganese	0.4	2.5	226.784	0.00440948	0.0110237	0	0.446	1.115	111.5	1.22914
Arsenic	0.01	100	226.784	0.00440948	0.440948	0	0	0	0	0
Lead	0.01	100	226.784	0.00440948	0.440948	0	0	0	0	0
Zinc	3	0.333333	226.784	0.00440948	0.00146983	0	0.446	0.148667	14.8667	0.0218514
		226.784			1		1.3641	5.90299	590.299	35.7664

## Sheet: wqi mid
							MIDDLE STREAM WQI
Parameter	WHO (SV)	1/Si	1/Si	K	W	Ideal Value (Vo)	V (point)	Vn/S	Qn	WnQn
pH	8.5	0.117647	226.784	0.00440948	0.000518762	7	-0.01	-0.00117647	-0.117647	-6.10308e-05
Chromium	0.05	20	226.784	0.00440948	0.0881895	0	0.0841	1.682	168.2	14.8335
Copper	2	0.5	226.784	0.00440948	0.00220474	0	0.0746	0.0373	3.73	0.00822367
Iron	0.3	3.33333	226.784	0.00440948	0.0146983	0	0.263	0.876667	87.6667	1.28855
Manganese	0.4	2.5	226.784	0.00440948	0.0110237	0	0.475	1.1875	118.75	1.30906
Arsenic	0.01	100	226.784	0.00440948	0.440948	0	0	0	0	0
Lead	0.01	100	226.784	0.00440948	0.440948	0	0	0	0	0
Zinc	3	0.333333	226.784	0.00440948	0.00146983	0	0.36	0.12	12	0.0176379
		226.784			1		1.2467	3.90229	390.229	17.4569

## Sheet: wqi down
							DOWN STREAM WQI
Parameter	WHO (SV)	1/Si	1/Si	K	W	Ideal Value (Vo)	V (point)	Vn/S	Qn	WnQn
pH	8.5	0.117647	226.784	0.00440948	0.000518762	7	-0.026	-0.00305882	-0.305882	-0.00015868
Chromium	0.05	20	226.784	0.00440948	0.0881895	0	0.194	3.88	388	34.2175
Copper	2	0.5	226.784	0.00440948	0.00220474	0	0.0675	0.03375	3.375	0.007441
Iron	0.3	3.33333	226.784	0.00440948	0.0146983	0	0.286	0.953333	95.3333	1.40123
Manganese	0.4	2.5	226.784	0.00440948	0.0110237	0	0.446	1.115	111.5	1.22914
Arsenic	0.01	100	226.784	0.00440948	0.440948	0	0	0	0	0
Lead	0.01	100	226.784	0.00440948	0.440948	0	0	0	0	0
Zinc	3	0.333333	226.784	0.00440948	0.00146983	0	0.359	0.119667	11.9667	0.0175889
		226.784			1		1.3265	6.09869	609.869	36.8728
